1 **Diversity increases yield but reduces reproductive effort in crop**  
2 **mixtures**

3

4 *Jianguo Chen*<sup>1,2</sup>, *Nadine Engbersen*<sup>1</sup>, *Laura Stefan*<sup>1</sup>, *Bernhard Schmid*<sup>3,4</sup>, *Hang Sun*<sup>2</sup>  
5 & *Christian Schöb*<sup>1\*</sup>

6

7 <sup>1</sup> Department of Environmental Systems Science, Swiss Federal Institute of  
8 Technology Zurich (ETH), 8092 Zurich, Switzerland

9 <sup>2</sup> CAS Key Laboratory for Plant Diversity and Biogeography of East Asia, Kunming  
10 Institute of Botany, Chinese Academy of Sciences, Kunming 650201, Yunnan, China

11 <sup>3</sup> Department of Geography, University of Zurich, Winterthurerstrasse 190, 8057  
12 Zurich, Switzerland

13 <sup>4</sup> Institute of Ecology, College of Urban and Environmental Sciences, Peking  
14 University, 100871 Beijing, China

15

16 \*Corresponding author: [christian.schoeb@usys.ethz.ch](mailto:christian.schoeb@usys.ethz.ch)

17 **Abstract**

18 **Resource allocation to reproduction is a critical trait for plant fitness<sup>1,2</sup>. This**  
19 **trait, called harvest index in the agricultural context<sup>3-5</sup>, determines how plant**  
20 **biomass is converted to seed yield and consequently financial revenue of**  
21 **numerous major staple crops. While plant diversity has been demonstrated to**  
22 **increase plant biomass<sup>6-8</sup>, plant diversity effects on seed yield of crops are**  
23 **ambiguous<sup>9</sup>. This discrepancy could be explained through changes in the**  
24 **proportion of resources invested into reproduction in response to changes in**  
25 **plant diversity, namely through changes of species interactions and**  
26 **microenvironmental conditions<sup>10-13</sup>. Here we show that increasing crop plant**  
27 **diversity from monoculture over 2- to 4-species mixtures increased annual**  
28 **primary productivity, resulting in overall higher plant biomass and, to a lesser**  
29 **extent, higher seed yield in mixtures compared with monocultures. The**  
30 **difference between the two responses to diversity was due to a reduced**  
31 **reproductive effort of the eight tested crop species in mixtures, possibly because**  
32 **their common cultivars have been bred for maximum performance in**  
33 **monoculture. While crop diversification provides a sustainable measure of**  
34 **agricultural intensification<sup>14</sup>, the use of currently available cultivars may**  
35 **compromise larger gains in seed yield. We therefore advocate regional breeding**  
36 **programs for crop varieties to be used in mixtures that should exploit facilitative**  
37 **interactions<sup>15</sup> among crop species.**

38

39 **Main text**

40 Based on the vast ecological literature demonstrating positive relationships between  
41 plant diversity and annual primary productivity<sup>16,17</sup>, increasing crop plant diversity  
42 through intercropping, i.e. the simultaneous cultivation of more than one crop species  
43 on the same land, has been proposed as a promising sustainable intensification  
44 measure in agriculture<sup>14,15,18</sup>. However, evidence on positive crop plant diversity–seed  
45 yield relationships is ambiguous<sup>9,19,20</sup>. This could be due to non-linear reproductive  
46 allocation patterns, where increased annual primary productivity in mixtures would  
47 not translate into corresponding increases in seed yield.

48 The amount of resources allocated to seeds is a critical component of plant  
49 fitness<sup>1,2,21-23</sup> and directly determines grain yield and the economic value of annual  
50 grain crops, including the major staple crops wheat, maize, rice, soybeans, beans and  
51 barley<sup>23-25</sup>. For crops, resource allocation has therefore been a target trait under  
52 selection during plant domestication<sup>26</sup> and modern plant breeding<sup>3</sup>. In general,  
53 reproductive allocation is allometric<sup>27</sup>, i.e. seed yield increases alongside vegetative  
54 plant biomass<sup>28,29</sup>. However, varying abiotic and biotic conditions such as climate,  
55 resource availability, competition or genotype identity can modify the allometric  
56 resource allocation pattern<sup>13,30-33</sup>.

57 Plant community diversity is known to trigger changes in resource allocation  
58 patterns<sup>34</sup> through plastic responses of the constituent plants<sup>35,36</sup>. Plastic responses of  
59 plants can contribute to niche differentiation processes, which in turn promote  
60 positive biodiversity–productivity relationships<sup>37,38</sup>. In other words, plastic changes in

61 resource allocation strategies in response to increasing plant diversity, such as a  
62 reduced reproductive effort due to relatively higher resource investment in vegetative  
63 plant parts with higher plant diversity, could diminish the biodiversity–seed yield  
64 relationship. However, this ecologically and economically very relevant question has,  
65 to our knowledge, not been scientifically addressed.

66       Understanding the abiotic and biotic factors concomitantly controlling the  
67 proportion of resources allocated to seeds is crucial for efforts to maintain or increase  
68 crop yields and to contribute to food security under a range of environmental and  
69 farming conditions. However, we lack an ecological understanding on how plant  
70 diversity, in interaction with the physical environment, influences reproductive effort  
71 of the constituent species. For this study, we therefore selected eight annual grain crop  
72 species commonly cultivated in Europe to determine their reproductive effort under  
73 varying species diversity levels, different climatic and soil fertility conditions and  
74 with locally adapted (i.e. home) versus foreign cultivars (i.e. away). To do this we  
75 conducted a common garden experiment replicated over two countries (Switzerland  
76 and Spain), two soil fertility levels (unfertilized and fertilised), two cultivars (Swiss  
77 and Spanish) and four plant diversity levels (i.e. isolated single plants, monocultures  
78 and 24 different 2- and 16 different 4-species mixtures) in a replicated fully factorial  
79 design.

80       Increasing crop diversity from monoculture to 2-species mixture increased seed  
81 yield by 3.4% in Spain and by 21.4% in Switzerland, while seed yield increases

82 reached 12.7% and 44.3% from monoculture to 4-species mixture in Spain and  
83 Switzerland, respectively (Fig. 1).

84 **Fig. 1: Seed yield response to crop diversity**

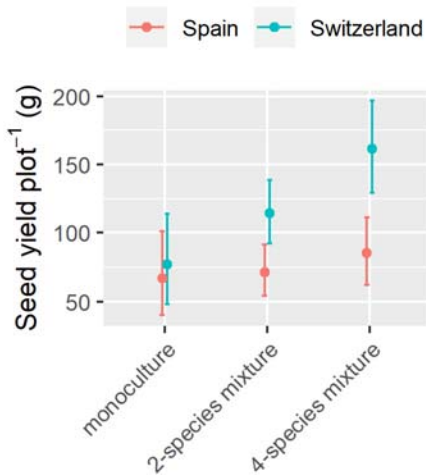

Average seed yield of eight monocultures, 24 different 2- and 16 different 4-species mixtures planted with eight different annual crop species in 0.25 m<sup>2</sup> plots in Switzerland and Spain. Data are mean and 95% CI. n = 762. See Extended Data Table 1 for the complete statistical analysis.

92

93 Even though crop diversity increased seed yield (Fig. 1), aboveground  
94 vegetative biomass increases with increasing crop diversity were 8.8- and 3.1-fold  
95 higher in Spain and Switzerland, respectively, than the increases in seed yield. The  
96 reduced benefit of crop diversity on seed yield compared with vegetative biomass was  
97 due to a reduction in both types of mechanisms underlying diversity effects on yield,  
98 i.e. complementarity and sampling effects<sup>17</sup> (Fig. 2). In Switzerland, complementarity  
99 effects contributed 25% more than sampling effects to the net biodiversity effect on  
100 seed yield, while in Spain only sampling effects could be detected. Complementarity  
101 effects in Switzerland were 59% lower for seed yield than for vegetative biomass.

102     Sampling effects were 70% and 83% lower for seed yield than for vegetative biomass

103     in Spain and Switzerland, respectively.

104

105 **Fig. 2: Crop plant diversity effects on seed yield and vegetative biomass**

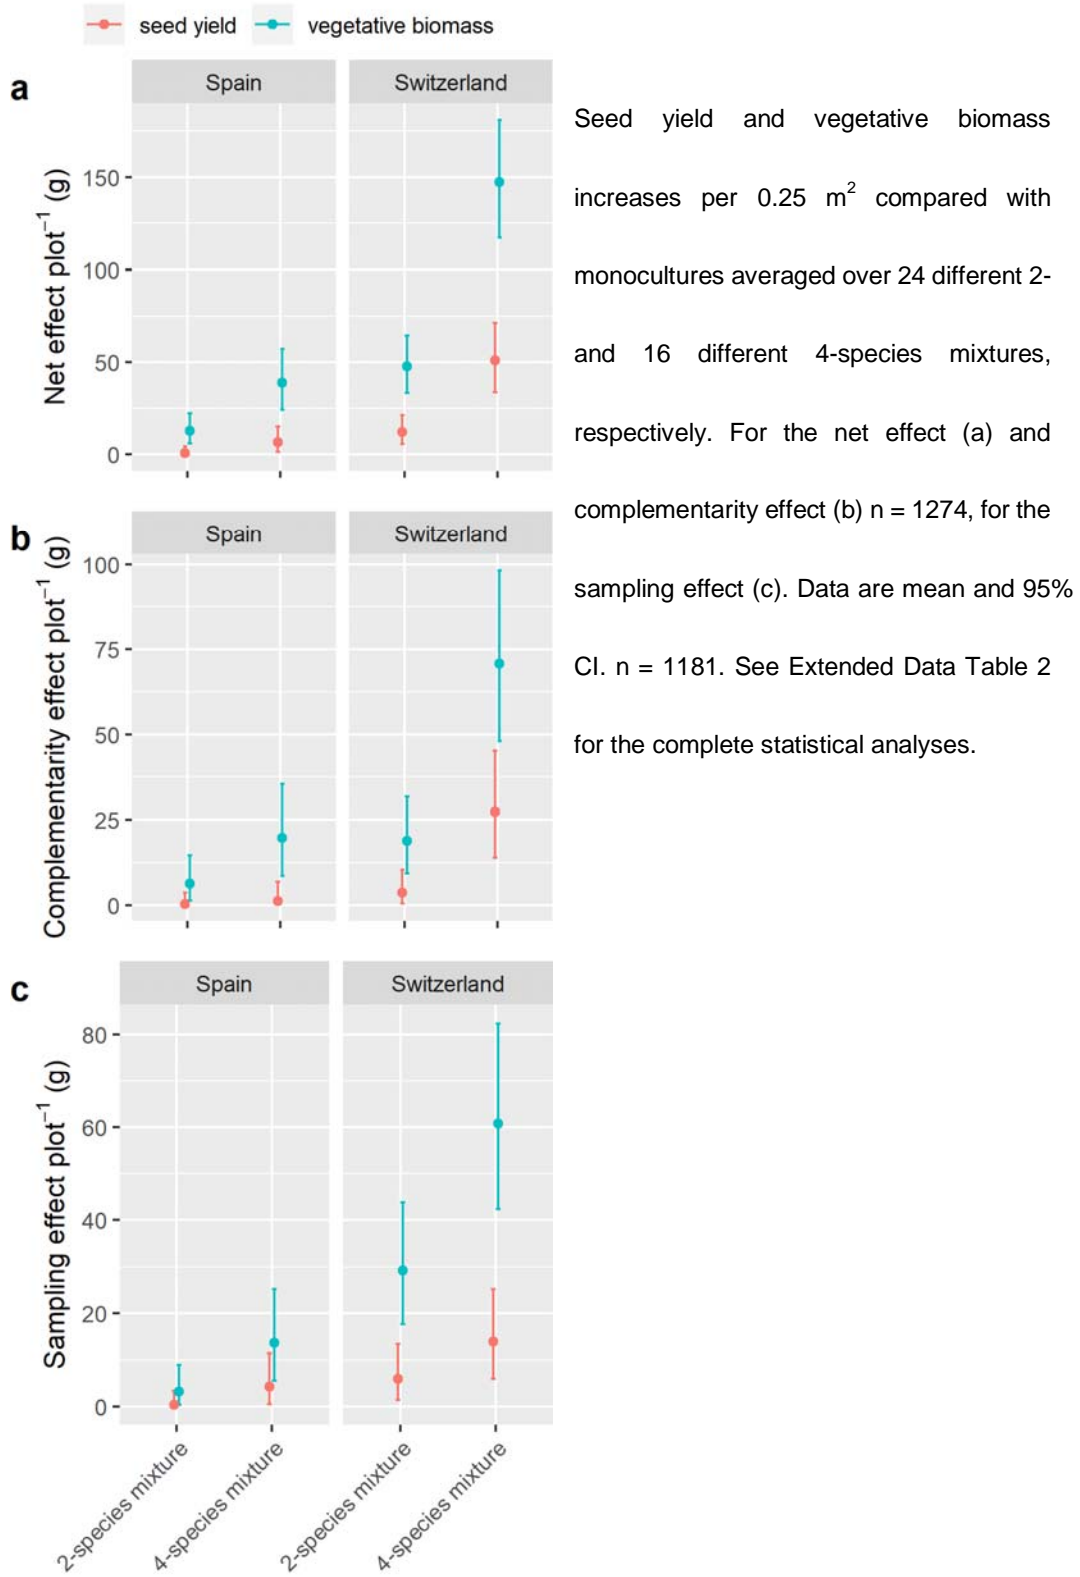

125 In line with these results at the plot level, we found at the individual plant level a  
126 clear trend towards reduced reproductive effort with increasing plant diversity (Fig.  
127 3a). Reproductive effort in monocultures was higher than in mixtures — an effect  
128 only weakly dependent on species and country (Fig. 3b). The strongest reductions in  
129 reproductive effort from monocultures to 4-species mixtures were observed in Spain  
130 for oat (−22%), linseed (−9%), wheat (−4%), lupin (−4%) and coriander (−4%), and in  
131 Switzerland for lupin (−13%), lentil (−7%), linseed (−7%), wheat (−5%) and coriander  
132 (−3%). Finally, reproductive effort was lower in 4-species mixtures than in 2-species  
133 mixtures (Fig. 3), except for locally adapted cultivars on fertilized soils (Extended  
134 Data Fig. 1).

135 Reproductive effort varied among species, being highest for legumes (i.e. *L.*  
136 *culinaris* (mean and 95% confidence interval): 0.60 [0.56, 0.63] and *L. angustifolius*:  
137 0.57 [0.53, 0.62]), followed by herbs (i.e. *C. sativum*: 0.64 [0.61, 0.68], *C. sativa*: 0.55  
138 [0.51, 0.59], *L. usitatissimum*: 0.51 [0.47, 0.55], *C. quinoa*: 0.49 [0.45, 0.53]), and  
139 lowest for cereals (i.e. *A. sativa*: 0.49 [0.48, 0.49], *T. aestivum*: 0.40 [0.37, 0.44]). The  
140 species-specific reproductive effort was also context-dependent and varied with  
141 ecotype and country and therefore with the home vs away environment. Reproductive  
142 effort was generally higher in Spain (0.56 [0.56, 0.57]) than in Switzerland (0.52  
143 [0.51, 0.53]), which is consistent with previous studies which found that plants  
144 allocated relatively more resources to reproductive structures under more severe  
145 environmental conditions<sup>39</sup>. In contrast, the higher reproductive efforts for legumes  
146 (lupin: +8%, lentil: +2%) and cereals (oat: +18%, wheat: +3.5%) in the home



147 compared with the away environment provides evidence for the importance of local  
148 adaptation<sup>40</sup> of crops for yield benefits (Extended Data Fig. 3).

149 **Fig. 3: Reproductive effort of crop species in response to plant diversity and**  
150 **country**

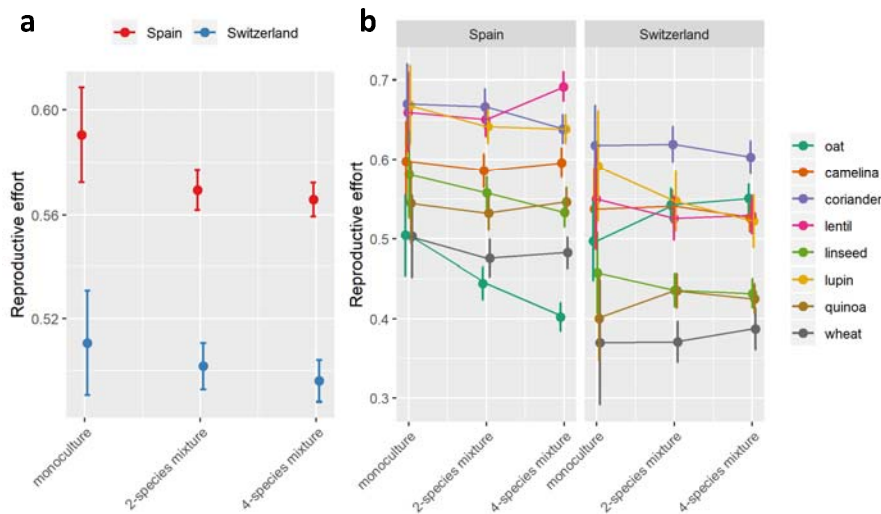

151  
152 Reproductive effort in response to plant diversity and country averaged over all species (a)  
153 and for each crop species separately (b). Data are mean and 95% CI. n = 4751. Reproductive  
154 effort of each species for each species combination is shown in Extended Data Fig. 2. See  
155 Extended Data Table 3 for the complete statistical analysis. Oat = *Avena sativa*, camelina =  
156 *Camelina sativa*, coriander = *Coriandrum sativum*, lentil = *Lens culinaris*, linseed = *Linum*  
157 *usitatissimum*, lupin = *Lupinus angustifolius*, quinoa = *Chenopodium quinoa*, wheat = *Triticum*  
158 *aestivum*.

159

160 Reduced reproductive effort in mixtures compared with monocultures was  
161 strongly linked to an increase in competition intensity (in particular for coriander,

162 wheat, linseed, oat, lupin and lentil). This is in line with previous research  
163 demonstrating a drop of the harvest index with increasing planting density of crops<sup>41</sup>.  
164 Beyond that, reduced plant height (in particular wheat, linseed, lupin, oat, lentil and  
165 quinoa) together with increased leaf area (in particular lupin, linseed, lentil and oat)  
166 and SLA (in particular quinoa, oat and coriander) in mixtures compared with  
167 monocultures went along with reduced reproductive effort. Finally, reproductive  
168 effort was reduced when LDMC was higher in mixtures than in monocultures for  
169 linseed and quinoa, and when LDMC was lower in mixtures than in monocultures for  
170 lentil, coriander and lupin.

171       Reproductive effort was highly responsive to the experimental treatments,  
172 including the different plant diversity levels, suggesting a plastic response of currently  
173 available crop plants to heterospecific neighbours in this trait. Specifically, the results  
174 demonstrate a deviation of resources away from reproduction towards the shoot with  
175 increasing neighbourhood plant diversity. This plastic response in resource allocation  
176 of crop plants in more diverse cropping systems compromises the yield benefits of  
177 crop mixtures. In the extreme case of oat in Spain, yield benefits in mixtures  
178 compared with monocultures were reduced by 14 and 20% in 2- and 4-species  
179 mixtures, respectively, only through the lower reproductive effort of this species in  
180 mixtures compared with monocultures.

181

182 **Fig. 4: Relationship of reproductive effort of eight crop species with plant**  
183 **functional traits**

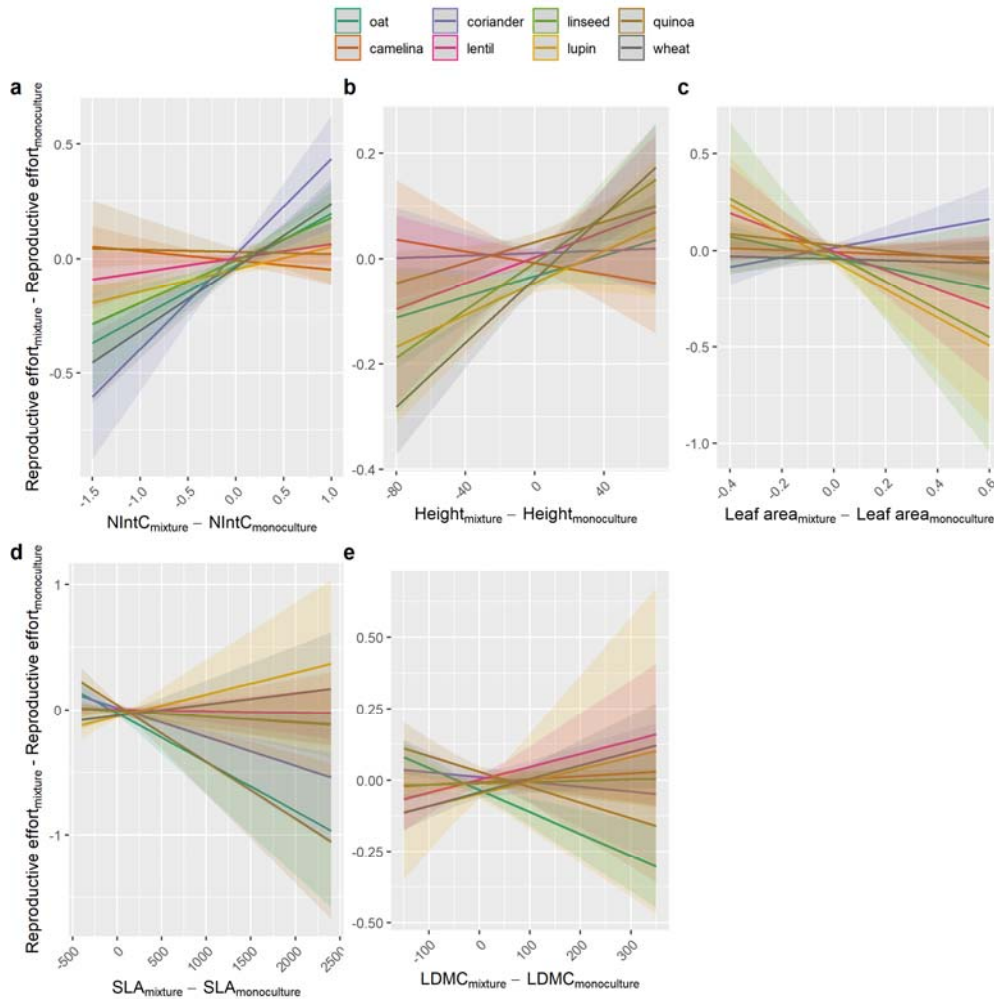

185 The difference in reproductive effort of eight crop species in mixtures compared with  
186 monocultures as a function of differences in competition intensity (NIntC; a), vegetative plant  
187 height (b), leaf area (c), specific leaf area (SLA; d) and leaf dry matter content (LDMC; e)  
188 between mixtures and monocultures. Data are mean and 95% CI. See Extended Data Table 4  
189 for the complete statistical analysis. Oat = *Avena sativa*, camelina = *Camelina sativa*,  
190 coriander = *Coriandrum sativum*, lentil = *Lens culinaris*, linseed = *Linum usitatissimum*, lupin =  
191 *Lupinus angustifolius*, quinoa = *Chenopodium quinoa*, wheat = *Triticum aestivum*.

192 Our study demonstrates that beyond evidence for the benefits of intercropping  
193 for seed yield, growing currently available crop cultivars in mixtures does not result in  
194 the same amount of resources allocated to seed yield as in monocultures, i.e. the plant  
195 community type for which they have been bred and for which reproductive effort has  
196 been maximised<sup>3</sup>. Indeed, the little available evidence about diversity effects on  
197 reproductive effort in natural plant populations does not evidence such a reduction in  
198 reproductive effort with increasing diversity<sup>42</sup>. This suggests that the current suite of  
199 crop cultivars is not appropriate to fully exploit the benefits of crop diversification for  
200 global food security, and that specific breeding programs may be required that  
201 maximize reproductive effort of crops under mixture conditions. In the same way as  
202 breeding for high monoculture yields was based on short-statured genotypes that do  
203 not engage so much in intraspecific light competition in monocultures<sup>3</sup>, it may be  
204 possible to breed for high mixture yields if traits can be identified that reduce  
205 interspecific competition or increase complementarity and facilitation among species  
206 above and below ground in mixtures. According to our results, these breeding  
207 programs may benefit from going back to locally adapted cultivars with higher  
208 reproductive effort in mixtures.

## 209 **References**

- 210 1. Weiner, J. *Plant Reproductive Ecology: Patterns and Strategies*. 228-245 (Oxford  
211 University Press, 1988).
- 212 2. Ashman, T. L. & Schoen, D. J. How long should flowers live. *Nature* **371**, 788-791  
213 (1994).

- 214 3. Donald, C. M. The breeding of crop ideotypes. *Euphytica* **17**, 385-403 (1968).
- 215 4. Unkovich, M., Baldock, J. & Forbes, M. Variability in harvest index of grain crops  
216 and potential significance for carbon accounting: Examples from Australian  
217 agriculture. *Adv. Agron.* **105**, 173-219 (2010).
- 218 5. Tamagno, S., Sadras, V. O., Ortez, O. A. & Ciampitti, I. A. Allometric analysis  
219 reveals enhanced reproductive allocation in historical set of soybean varieties. *Field*  
220 *Crop Res.* **248**, online, doi: 10.1016/j.fcr.2020.107717 (2020).
- 221 6. Hector, A. *et al.* Plant diversity and productivity experiments in European  
222 grasslands. *Science* **286**, 1123-1127 (1999).
- 223 7. Grace, J. B. *et al.* Integrative modelling reveals mechanisms linking productivity  
224 and plant species richness. *Nature* **529**, 390-393 (2016).
- 225 8. Huang, Y. *et al.* Impacts of species richness on productivity in a large-scale  
226 subtropical forest experiment. *Science* **362**, 80-83 (2018).
- 227 9. Letourneau, D. K. *et al.* Does plant diversity benefit agroecosystems? A synthetic  
228 review. *Ecol. Appl.* **21**, 9-21 (2011).
- 229 10. McConnaughay, K. D. M. & Coleman, J. S. Biomass allocation in plants:  
230 Ontogeny or optimality? A test along three resource gradients. *Ecology* **80**, 2581-2593  
231 (1999).
- 232 11. Bonser, S. P. & Aarssen, L. W. Allometry and plasticity of meristem allocation  
233 throughout development in *Arabidopsis thaliana*. *J. Ecol.* **89**, 72-79 (2001).
- 234 12. Reekie, E. G. & Bazzaz, F. A. *Reproductive Allocation in Plants*. (Elsevier  
235 Academic press, 2005).

- 236 13. Wang, T. H., Zhou, D. W., Wang, P. & Zhang, H. X. Size-dependent reproductive  
237 effort in *Amaranthus retroflexus*: the influence of planting density and sowing date.  
238 *Can. J. Bot.* **84**, 485-492 (2006).
- 239 14. Gurr, G. M. *et al.* Multi-country evidence that crop diversification promotes  
240 ecological intensification of agriculture. *Nat. Plants* **2**, 16014 (2016).
- 241 15. Li, L., Tilman, D., Lambers, H. & Zhang, F. S. Plant diversity and overyielding:  
242 insights from belowground facilitation of intercropping in agriculture. *New Phytol.*  
243 **203**, 63-69 (2014).
- 244 16. Tilman, D., Reich, P. B., Knops, J., Wedin, D., Mielke, T., Lehman, C. Diversity  
245 and productivity in a long-term grassland experiment. *Science* **294**, 843-845 (2001).
- 246 17. Loreau, M. & Hector, A. Partitioning selection and complementarity in  
247 biodiversity experiments. *Nature* **412**, 72-76 (2001).
- 248 18. Brooker, R. W. *et al.* Improving intercropping: a synthesis of research in  
249 agronomy, plant physiology and ecology. *New Phytol.* **206**, 107-117 (2015).
- 250 19. Martin-Guay, M. O., Paquette, A., Dupras, J. & Rivest, D. The new green  
251 revolution: Sustainable intensification of agriculture by intercropping. *Sci. Total*  
252 *Environ.* **615**, 767-772 (2018).
- 253 20. Li, C., Hoffland, E., Kuypers, T. W., Yu, Y., Zhang, C., Li, H., Zhang, F., van der  
254 Werf, W. Syndromes of production in intercropping impact yield gains. *Nat. Plants*  
255 (2020). <https://doi.org/10.1038/s41477-020-0680-9>
- 256 21. Bazzaz, F. A., Chiariello, N. R., Coley, P. D. & Pitelka, L. F. Allocating resources  
257 to reproduction and defense. *Bioscience* **37**, 58-67 (1987).

- 258 22. Hartnett, D. C. Size-Dependent allocation to sexual and vegetative reproduction in  
259 4 clonal composites. *Oecologia* **84**, 254-259 (1990).
- 260 23. Vega, C. R. C., Sadras, V. O., Andrade, F. H. & Uhart, S. A. Reproductive  
261 allometry in soybean, maize and sunflower. *Ann. Bot.* **85**, 461-468 (2000).
- 262 24. Gifford, R. M., Thorne, J. H., Hitz, W. D. & Giaquinta, R. T. Crop productivity  
263 and photoassimilate partitioning. *Science* **225**, 801-808 (1984).
- 264 25. Andrade, F. H. *et al.* Kernel number determination in maize. *Crop Sci.* **39**,  
265 453-459 (1999).
- 266 26. Milla, R., Osborne, C. P., Turcotte, M. M. & Violle, C. Plant domestication  
267 through an ecological lens. *Trends Ecol. Evol.* **30**, 463-469 (2015).
- 268 27. Niklas, K. J. *Plant Allometry: The Scaling of Form and Process*. (University of  
269 Chicago Press, 1994).
- 270 28. Echarte, L. & Andrade, F. H. Harvest index stability of Argentinean maize  
271 hybrids released between 1965 and 1993. *Field Crop Res.* **82**, 1-12 (2003).
- 272 29. Weiner, J., Campbell, L. G., Pino, J. & Echarte, L. The allometry of reproduction  
273 within plant populations. *J. Ecol.* **97**, 1220-1233 (2009).
- 274 30. Sugiyama, S. & Bazzaz, F. A. Size dependence of reproductive allocation: the  
275 influence of resource availability, competition and genetic identity. *Funct. Ecol.* **12**,  
276 280-288 (1998).
- 277 31. Weiner, J. Allocation, plasticity and allometry in plants. *Perspect. Plant Ecol.* **6**,  
278 207-215 (2004).

- 279 32. Weiner, J. *et al.* Is reproductive allocation in *Senecio vulgaris* plastic? *Botany* **87**,  
280 475-481 (2009).
- 281 33. Schmid, B., Weiner, J. Plastic relationships between reproductive and vegetative  
282 mass in *Solidago altissima*. *Evolution* **47**, 61-74 (1993).
- 283 34. Schmid, B. & Pfisterer, A.B. Species vs community perspectives in biodiversity  
284 experiments. *Oikos* **100**, 620-621 (2003).
- 285 35. Lipowsky, A., Roscher, C., Schumacher, J, Michalski, S. G., Gubsch, M.,  
286 Buchmann, N., Schulze, E.-D. & Schmid, B. Plasticity of functional traits of forb  
287 species in response to biodiversity. *Perspect. Plant Ecol. Evol. Syst.* **17**, 66-77 (2015).
- 288 36. Abakumova, M., Zobel, K., Lepik, A. & Semchenko, M. Plasticity in plant  
289 functional traits is shaped by variability in neighbourhood species composition. *New*  
290 *Phytol.* **211**, 455-463 (2016).
- 291 37. Zhu, J. Q., van der Werf, W., Anten, N. P. R., Vos, J. & Evers, J. B. The  
292 contribution of phenotypic plasticity to complementary light capture in plant mixtures.  
293 *New Phytol.* **207**, 1213-1222 (2015).
- 294 38. Niklaus, P. A., Baruffol, M., He, J. S., Ma, K. P. & Schmid, B. Can niche  
295 plasticity promote biodiversity-productivity relationships through increased  
296 complementarity? *Ecology* **98**, 1104-1116 (2017).
- 297 39. Sadras, V. O., Bange, M. P. & Milroy, S. P. Reproductive allocation of cotton in  
298 response to plant and environmental factors. *Ann. Bot.* **80**, 75-81 (1997).
- 299 40. Joshi, J., Schmid, B., Caldeira, M.C., Dimitrakopoulos, P.G., Good, J., Harris, R.,  
300 Hector, A., Huss-Danell, K., Jumpponen, A., Minns, A., Mulder, C.P.H., Pereira, J.S.,



301 Prinz, A., Scherer-Lorenzen, M., Siamantziouras, A.-S.D., Terry, A.C., Troumbis,  
302 A.Y. and Lawton, J.H. Local adaptation enhances performance of common plant  
303 species. *Ecol. Lett.* **4**: 536-544 (2001).

304 41. Li, J., Xie, R. Z., Wang, K. R., Ming, B., Guo, Y. Q., Zhang, G. Q. and Li, S. K.  
305 Variations in maize dry matter, harvest index, and grain yield with plant density.  
306 *Agron. J.* **107**: 829-834 (2015).

307 42. Roscher, C. & Schumacher, J. Positive diversity effects on productivity in  
308 mixtures of arable weed species as related to density–size relationships. *J. Plant Ecol.*  
309 **9**, 792-804 (2016).

310

## 311 **Methods**

### 312 *Study sites*

313 The crop diversity experiment was carried out in outdoor experimental gardens in  
314 Zurich (Switzerland) and Torrejón el Rubio (Cáceres, Spain), i.e. two sites with  
315 striking differences in climate and soil. Spain is Mediterranean semiarid while  
316 Switzerland is temperate humid. In Zurich, the garden was located at the Irchel  
317 campus of the University of Zurich (47.3961 N, 8.5510 E, 508 m a.s.l.). In Torrejón el  
318 Rubio, the garden was situated at the Aprisco de Las Corchuelas research station  
319 (39.8133 N, 6.0003 W, 350 m a.s.l.). During the growing season, the main climatic  
320 differences between sites are precipitation (572 mm in Zurich between April and  
321 August vs 218 mm in Cáceres between February and June) and daily average hours of  
322 sunshine (5.8 h in Zurich vs 8.4 h in Cáceres), but there is little difference in terms of

323 temperature (average daily mean, min and max temperatures are 14.0 °C, 9.3 °C and  
324 18.6 °C in Zurich vs 14.6 °C, 9.6 °C and 19.6 °C in Cáceres). All climatic data are  
325 from the Deutsche Wetterdienst ([www.dwd.de](http://www.dwd.de)) and are average values over the years  
326 1961 to 1990.

327       Each experimental garden consisted of beds with square plots of 0.25 m<sup>2</sup> that  
328 were raised by 30 cm above the soil surface. In Switzerland, we had 554 plots spread  
329 over 20 beds of 1×7 m, with 26 to 28 plots per bed. In Spain, we had 624 plots spread  
330 over 16 beds of 1×10 m, with 38 to 40 plots per bed. The soil surface consisted of  
331 penetrable standard local agricultural soil, covered by a penetrable fleece. On top of  
332 the fleece, each box was filled with 30 cm standard, but not enriched, local  
333 agricultural soil. The local soil in Switzerland was a neutral loamy soil consisting of  
334 45% sand, 45% silt and 10% clay. Soil pH was 7.25, total C and N were 2.73% and  
335 0.15%, respectively, and total and available P were 339.7 mg/kg and 56.44 mg/kg,  
336 respectively. The local soil in Spain was a slightly acidic sandy soil consisting of 78%  
337 sand, 20% silt and 2% clay. Soil pH was 6.39, total C and N were 1.02% and 0.06%,  
338 respectively, and total and available P were 305.16 mg/kg and 66.34 mg/kg,  
339 respectively. Therefore, compared with the soil in Switzerland, the soil in Spain was  
340 sandier and poorer in soil organic matter.

#### 341 *Study species*

342 The eight selected crop species were: *Triticum aestivum* (wheat), *Avena sativa* (oat),  
343 *Lens culinaris* (lentil), *Coriandrum sativum* (coriander), *Camelina sativa* (camelina),

344 *Lupinus angustifolius* (blue lupin), *Linum usitatissimum* (linseed), and *Chenopodium*  
345 *quinoa* (quinoa). These species are important annual seed crops that can be cultivated  
346 in Europe. The eight species belong to four phylogenetic groups, with two species per  
347 group. We had monocots [*A. sativa* (Poaceae) and *T. aestivum* (Poaceae)] vs dicots.  
348 Then, among the dicots, we differentiated between superasterids [*C. sativum*  
349 (Apiaceae) and *C. quinoa* (Amaranthaceae)] and superrosids. Among the superrosids,  
350 we finally differentiated between legumes [*L. culinaris* (Fabaceae) and *L.*  
351 *angustifolius* (Fabaceae)] and non-legumes [*C. sativa* (Brassicaceae) and *L.*  
352 *usitatissimum* (Linaceae)]. Each species was represented by two cultivars (hereafter  
353 called ecotypes), one local cultivar from Switzerland and another local cultivar from  
354 Spain (Extended Data Table 5). For cultivar selection we considered, whenever  
355 possible, traditional varieties with some inherent genetic variability within species.

### 356 *Experimental design*

357 The experimental design included a nested plant diversity treatment: (1) single control  
358 plants for each species (between 4 and 10 replicates depending on species and country)  
359 vs plant communities (i.e. factor ‘Community’); (2) within plant communities there  
360 were monocultures for each species (2 replicates) vs species mixtures (i.e. factor  
361 ‘Diversity’); (3) within species mixtures there were all possible 2-species mixtures  
362 consisting of two phylogenetic groups each (2 replicates of 24 different species  
363 combinations), and all possible 4-species mixtures consisting of four phylogenetic  
364 groups each (2 replicates of 16 species combinations) (i.e. factor ‘Species number’).  
365 To test for the context dependency of reproductive allocation patterns at different

366 plant diversity levels, this setup was replicated at two levels of soil fertility  
367 (unfertilized control plots vs fertilized plots; factor ‘Fertilisation’). In the fertilised  
368 plots we applied 120 kg/ha N, 205 kg/ha P and 120 kg/ha K divided over three  
369 fertilisation events of 50 kg N/ha applied one day before sowing, another 50 kg N/ha  
370 after tillering of wheat and the remaining 20 kg N/ha during the flowering stage of  
371 wheat. The described experimental setup was further replicated for the Swiss and the  
372 Spanish ecotypes (i.e. factor ‘Ecotype’) both in Switzerland and in Spain (i.e. factor  
373 ‘Country’). The interaction between ‘Ecotype’ and ‘Country’ was assessed as  
374 additional factor ‘Home’, with two factor levels: ‘home’ representing Spanish  
375 cultivars in Spain and Swiss cultivars in Switzerland and ‘away’ representing the  
376 opposite combinations.

#### 377 *Experimental setup and data collection*

378 In Spain, the seeds were sown between 2 and 4 February 2018 and in Switzerland  
379 between 4 and 6 April 2018. All the seeds were sown by hand at a standard sowing  
380 density for the corresponding crop species: 400 seeds/m<sup>2</sup> for cereals, 240 seeds/m<sup>2</sup> for  
381 superasterids, 592 seeds/m<sup>2</sup> for non-legume superrosids, and 160 seeds/m<sup>2</sup> for  
382 legumes. Sowing was conducted in four rows of 45 cm length per plot and an  
383 inter-row distance of 12 cm. Sowing depth was 0.5 cm for *C. sativa*, 5 cm for *L.*  
384 *culinaris* and 2 cm for all other species. For the isolated single-plant treatment we  
385 placed five seeds in the center of the plot, randomly selected one plant approx. three  
386 weeks after germination and manually removed the spare individuals. Weeds were  
387 manually removed from all monoculture and mixture plots approx. 80 days after

388 sowing, while weeds in the plots with isolated single plants were removed several  
389 times during the growing season to avoid competition of the single plants with the  
390 otherwise abundant weeds in these plots. No other interventions were made over the  
391 course of the experiment, e.g. no harrowing or pesticide application. Harvest was  
392 conducted for each species once it reached maturity and lasted in Spain between 15  
393 June and 11 July for all species except *C. quinoa*, which was harvested between 26  
394 July and 21 August. Harvest in Switzerland was between 11 and 13 July for *C. sativa*  
395 and between 26 July and 5 September for all other species. In each plot (except for  
396 isolated single plants) and for each species we randomly marked three individuals  
397 during the flowering stage (i.e. 6154 individuals). All the marked individuals were  
398 harvested separately and seeds (i.e. reproductive biomass) were separated from all  
399 other aboveground biomass, incl. stems, leaves and chaff (i.e. vegetative biomass).  
400 While seeds were air-dried, vegetative biomass was oven-dried at 80 °C for 48 h prior  
401 to weighing.

#### 402 *Data analyses*

403 Plot-level yield responses to the experimental treatments were assessed using a linear  
404 mixed effects model with (1) country, ecotype and home vs away; (2) fertilisation,  
405 and (3) diversity and species number, and their interactions as fixed effects and  
406 species composition and bed ID as random effects. Plot-level yield as the total mass  
407 of all seeds produced in a plot was square-root transformed to meet assumptions of  
408 parametric statistics. Significance of each factor was assessed using type-I analysis of  
409 variance with Satterthwaite's method.

410 In order to assess differences in biodiversity effects on vegetative biomass  
411 versus grain yield, we applied the additive partitioning method<sup>17</sup> of biodiversity  
412 effects and calculated net effects, complementarity effects and sampling effects  
413 separately for vegetative biomass and grain yield. Differences in their responses to  
414 experimental treatments were tested with a linear mixed-effects model with net effect,  
415 complementarity effect or sampling effect as response variables and organ (shoot *vs*  
416 seeds), country, ecotype, home *vs* away, fertilisation, species number (2 *vs* 4) and  
417 their possible interactions as fixed effects. Bed ID and plot ID were included as  
418 random terms. The three response variables were square-root transformed to meet  
419 assumptions of parametric statistics. Significance of each factor was assessed using  
420 type-I analysis of variance with Satterthwaite's method.

421 Reproductive effort was calculated for each sampled individual that produced  
422 seeds (i.e. 5107 individuals included, while 1047 individuals were excluded due to  
423 mortality, lack of mature seeds or missing data) as  $RE = \text{reproductive biomass} / (\text{vegetative biomass} + \text{reproductive biomass})$ . To detect the effects of (1)  
424 species, (2) country, ecotype and home, (3) fertilization, (4) species number (two- *vs*  
425 four-species) nested within diversity (monoculture *vs* mixture) nested within  
426 community (single individual *vs* community) and the possible interactions between  
427 these factors on reproductive effort of the crops, we used a linear mixed-effects model  
428 and type-I analysis of variance. Reproductive effort was square-root-transformed to  
429 meet normality and homoscedasticity of variance assumptions. We included bed ID  
430 and plot ID as well as the species composition as random factors into the model.  
431

432 In order to test for functional plant traits related to reproductive effort of crops  
433 when neighbour diversity increased, we quantified differences in plant interaction  
434 intensity and plant functional traits between mixtures and monocultures and related  
435 them to the changes in reproductive effort of plants from monoculture to mixture.  
436 Plant interaction intensity in the plots was calculated for each individual by means of  
437 the neighbour-effect intensity index with commutative symmetry (NIntC)<sup>42</sup>. NIntC is  
438 based on the difference in aboveground net primary productivity in any monoculture  
439 or mixture compared to the average aboveground primary productivity of the same  
440 species and ecotype in the same country and soil fertility but growing as an isolated  
441 single plant without neighbours, and calculated as:

$$442 \text{NIntC} = 2 \times [\Delta P / (\Sigma P + |\Delta P|)].$$

443 As plant traits we used vegetative plant height, leaf area, SLA and LDMC. SLA and  
444 LDMC together reflect a fundamental trade-off in plant functioning between a rapid  
445 production of biomass (i.e. high SLA and low LDMC) and an efficient conservation  
446 of nutrients (i.e. low SLA and high LDMC)<sup>43</sup>, and the plant's capacity of endurance  
447 and resistance in harsh environment<sup>44-46</sup>. Vegetative plant height reflects plant's  
448 ability to capture light energy in competition through relatively high growth rates<sup>47,48</sup>.

449 In a linear mixed-effects model we assessed the response of  $\Delta RE_{\text{mixture-monoculture}}$  to  
450  $\Delta \text{NIntC}_{\text{mixture-monoculture}}$ ,  $\Delta \text{height}_{\text{mixture-monoculture}}$ ,  $\Delta \text{leaf area}_{\text{mixture-monoculture}}$ ,  
451  $\Delta \text{SLA}_{\text{mixture-monoculture}}$  and  $\Delta \text{LDMC}_{\text{mixture-monoculture}}$  and their interactions with species.  
452 Bed and plot ID were included as random terms. Statistical significance of each factor  
453 was tested with type-III analysis of variance.

454 All analyses were conducted with R version 3.6.2<sup>49</sup>. Reported figures, including  
455 means and confidence intervals are for estimated marginal means calculated using  
456 `ggemmeans()` in *ggeffects*<sup>50</sup> and plotted with `plot_model()` in *sjPlot*<sup>51</sup>.

## 457 **References Methods**

458 42. Díaz-Sierra, R., Verwijmeren, M., Rietkerk, M., de Dios, V. R., Baudena, M. A  
459 new family of standardized and symmetric indices for measuring the intensity and  
460 importance of plant neighbour effects. *Methods Ecol Evol* **8**, 580-591 (2017).

461 43. Poorter, H., Garnier, E. Ecological significance of inherent variation in relative  
462 growth rate and its components. Handbook of Functional Plant Ecology (eds. F.I.  
463 Pugnaire and F. Valladares), pp81-120. Marcel Dekker, Inc., New York (1999).

464 44. Grime, J. P. Evidence for existence of 3 primary strategies in plants and its  
465 relevance to ecological and evolutionary theory. *Am. Nat.* **111**, 1169-1194 (1977).

466 45. Wilson, P. J., Thompson, K., Hodgson, J. G. Specific leaf area and leaf dry matter  
467 content as alternative predictors of plant strategies. *New Phytol.* **143**, 155-162 (1999).

468 46. Poorter, H., Niinemets, U., Poorter, L., Wright, I. J., Villar, R. Causes and  
469 consequences of variation in leaf mass per area (LMA): a meta-analysis. *New Phytol.*  
470 **182**, 565-588 (2009).

471 47. Lavorel, S., Grigulis, K. How fundamental plant functional trait relationships  
472 scale-up to trade-offs and synergies in ecosystem services. *J. Ecol.* **100**, 128-140  
473 (2012).

474 48. Conti, G., Díaz, S. Plant functional diversity and carbon storage - an empirical test  
475 in semi-arid forest ecosystems. *J. Ecol.* **101**, 18-28 (2013).



476 49. R Core Team. *R: A language and environment for statistical computing*. (R

477 Foundation for Statistical Computing, Vienna, Austria, 2019).

478 <https://www.r-project.org/>

479 50. Lüdecke, D. ggeffects: Tidy data frames of marginal effects from regression

480 models. *Journal of Open Source Software* **3**, 772 (2018).

481 51. Lüdecke, D. sjPlot: Data visualization for statistics in social science. Zenodo.

482 <http://doi.org/10.5281/zenodo.1308157>. (2020).

483

#### 484 **Acknowledgements**

485 This work was financially supported by the Swiss National Science Foundation (PP

486 PPOOP3\_170645 to CS). JC was supported by the China Scholarship Council.

487 Thanks to C. Barriga Cabanillas, E. P. Carbonell, H. Ramos Marcos, E. Hidalgo

488 Froilán, A. García-Astillero Honrado, R. Hüppi and S. Baumgartner for field

489 assistance.

#### 490 **Author contributions**

491 CS and JC conceptualised the study; CS designed the experiment with input from BS;

492 NE, LS and CS carried out the experiment, CS, BS and JC analysed the data; JC and

493 CS wrote the paper with input from BS, NE, LS and HS.

#### 494 **Competing interests**

495 The authors declare no competing financial interests.

496 **Materials & Correspondence**

497 Correspondence and requests for materials should be addressed to Christian Schöb.

498 **Data availability statement**

499 The data that support the findings of this study are available from the corresponding

500 author upon reasonable request.

501 **Supplementary Information** is available for this paper.

502 - R code

503 - data

504 **Extended Data**

505 **Extended Data Table 1 | Type-I Analysis of Variance table testing the**  
 506 **experimental treatment effects on plot-level seed yield**

507

| Factor                                   | SS     | MS       | numDF | denDF | F-value | P-value |
|------------------------------------------|--------|----------|-------|-------|---------|---------|
| Country                                  | 835.01 | 835.01   | 1     | 20.8  | 71.23   | <0.001  |
| Ecotype                                  | 966.21 | 966.21   | 1     | 688.7 | 82.43   | <0.001  |
| Home                                     | 127.35 | 127.35   | 1     | 689.1 | 10.86   | 0.001   |
| Fertilisation                            | 30.41  | 30.41    | 1     | 20.8  | 2.59    | 0.122   |
| Diversity                                | 32.81  | 32.81    | 1     | 45.1  | 2.80    | 0.101   |
| Species number                           | 34.04  | 34.04    | 1     | 44.9  | 2.90    | 0.095   |
| Country × Fertilisation                  | 32.76  | 32.76    | 1     | 20.8  | 2.80    | 0.110   |
| Ecotype × Fertilisation                  | 9.46   | 9.46     | 1     | 688.0 | 0.81    | 0.369   |
| Home × Fertilisation                     | 0.73   | 0.73     | 1     | 688.1 | 0.06    | 0.803   |
| Country × Diversity                      | 120.78 | 120.78   | 1     | 676.9 | 10.30   | 0.001   |
| Country × Species number                 | 60.13  | 60.13    | 1     | 678.5 | 5.13    | 0.024   |
| Ecotype × Diversity                      | 24.07  | 24.07    | 1     | 689.4 | 2.05    | 0.152   |
| Ecotype × Species number                 | 13.59  | 13.59    | 1     | 693.0 | 1.16    | 0.282   |
| Home × Diversity                         | 27.04  | 27.04    | 1     | 689.6 | 2.31    | 0.129   |
| Home × Species number                    | 5.02   | 5.02     | 1     | 693.0 | 0.43    | 0.513   |
| Fertilisation × Diversity                | 3.05   | 3.05     | 1     | 676.8 | 0.26    | 0.610   |
| Fertilisation × Species number           | 10.48  | 10.48    | 1     | 678.2 | 0.89    | 0.345   |
| Country × Fertilisation × Diversity      | 0.89   | 0.89     | 1     | 676.7 | 0.08    | 0.782   |
| Country × Fertilisation × Species number | 0.32   | 0.32     | 1     | 678.2 | 0.03    | 0.869   |
| Ecotype × Fertilisation × Diversity      | 4.83   | 4.83     | 1     | 689.2 | 0.41    | 0.521   |
| Ecotype × Fertilisation × Species number | 0.08   | 0.08     | 1     | 693.0 | 0.01    | 0.934   |
| Home × Fertilisation × Diversity         | 9.15   | 9.15     | 1     | 689.2 | 0.78    | 0.377   |
| Home × Fertilisation × Species number    | 0.04   | 0.04     | 1     | 693.0 | 0.00    | 0.956   |
| Random factor                            | n      | Variance | SD    |       |         |         |
| Species composition                      |        | 48       | 5.65  | 2.38  |         |         |
| Bed ID                                   |        | 29       | 0.12  | 0.35  |         |         |
| Residual                                 |        |          | 11.72 | 3.42  |         |         |

508

509 Significance was tested with the Satterthwaite approximation method. n = 762.

510 Marginal  $R^2 = 0.19$ , conditional  $R^2 = 0.46$ .

511

512  
513  
514

**Extended Data Table 2 | Type-I Analysis of Variance table testing the experimental treatment effects on net effect, complementarity effect and sampling effect**

| Factor                         | Net effect |        |        |        |          |             | Complementarity effect |       |        |        |          |             | Sampling effect |       |        |        |          |             |
|--------------------------------|------------|--------|--------|--------|----------|-------------|------------------------|-------|--------|--------|----------|-------------|-----------------|-------|--------|--------|----------|-------------|
|                                | SS         | MS     | num DF | den DF | F-val ue | P-val ue    | SS                     | MS    | num DF | den DF | F-val ue | P-val ue    | SS              | MS    | num DF | den DF | F-val ue | P-val ue    |
| Organ (shoot vs seeds)         | 381        |        |        | 621.   | 231.     | <0.0        | 161                    | 1615. |        | 621.   | 82.0     | <0.0        | 195             | 1956. |        | 575.   | 159.     | <0.0        |
|                                | 9.2        | 3819.2 | 1      | 0      | 42       | <b>01</b>   | 5.3                    | 3     | 1      | 0      | 8        | <b>01</b>   | 6.4             | 4     | 1      | 3      | 82       | <b>01</b>   |
| Country                        | 585.       |        |        |        | 35.5     | <0.0        | 212.                   |       |        |        | 10.7     | <b>0.00</b> | 191.            |       |        |        | 15.6     | <0.0        |
|                                | 9          | 585.9  | 1      | 23.1   | 0        | <b>01</b>   | 3                      | 212.3 | 1      | 23.4   | 9        | <b>3</b>    | 6               | 191.6 | 1      | 22.7   | 5        | <b>01</b>   |
| Ecotype                        |            |        |        | 610.   |          | 0.27        |                        |       |        | 608.   |          | 0.12        |                 |       |        | 565.   |          | <b>0.03</b> |
|                                | 19.4       | 19.4   | 1      | 9      | 1.17     | 9           | 47.4                   | 47.4  | 1      | 7      | 2.41     | 1           | 55.1            | 55.1  | 1      | 1      | 4.50     | <b>4</b>    |
| Home vs Away                   |            |        |        | 610.   |          | 0.46        |                        |       |        | 608.   |          | 0.93        |                 |       |        | 565.   |          | 0.50        |
|                                | 8.7        | 8.7    | 1      | 9      | 0.52     | 9           | 0.2                    | 0.2   | 1      | 7      | 0.01     | 0           | 5.6             | 5.6   | 1      | 1      | 0.45     | 1           |
| Fertilisation                  |            |        |        |        |          | 0.10        |                        |       |        |        |          | 0.70        |                 |       |        |        |          | 0.09        |
|                                | 47.8       | 47.8   | 1      | 23.1   | 2.90     | 2           | 2.8                    | 2.8   | 1      | 23.4   | 0.14     | 8           | 37.1            | 37.1  | 1      | 22.7   | 3.03     | 5           |
| Species number                 |            |        |        | 605.   | 41.4     | <0.0        | 404.                   |       |        | 603.   | 20.5     | <0.0        | 200.            |       |        | 560.   | 16.3     | <0.0        |
|                                | 683.4      | 683.4  | 1      | 9      | 1        | <b>01</b>   | 3                      | 404.3 | 1      | 9      | 4        | <b>01</b>   | 4               | 200.4 | 1      | 2      | 7        | <b>01</b>   |
| Country × Fertilisation        |            |        |        |        | <0.0     | 0.98        |                        |       |        |        |          | 0.30        |                 |       |        |        |          | 0.08        |
|                                | <0.1       | <0.1   | 1      | 23.1   | 1        | 5           | 21.8                   | 21.8  | 1      | 23.4   | 1.11     | 3           | 39.0            | 39.0  | 1      | 22.7   | 3.19     | 8           |
| Ecotype × Fertilisation        |            |        |        | 610.   |          | <b>0.00</b> | 148.                   |       |        | 608.   |          | <b>0.00</b> |                 |       |        | 565.   |          | 0.85        |
|                                | 119.7      | 119.7  | 1      | 9      | 7.25     | 7           | 4                      | 148.4 | 1      | 6      | 7.54     | <b>6</b>    | 0.4             | 0.4   | 1      | 1      | 0.04     | 0           |
| Home vs Away × Fertilisation   |            |        |        | 610.   | 11.8     | <0.0        | 264.                   |       |        | 608.   | 13.4     | <0.0        |                 |       |        | 565.   |          | 0.43        |
|                                | 195.5      | 195.5  | 1      | 9      | 5        | <b>01</b>   | 2                      | 264.2 | 1      | 6      | 2        | <b>01</b>   | 7.5             | 7.5   | 1      | 2      | 0.61     | 4           |
| Country × Species number       |            |        |        | 605.   |          | <b>0.02</b> | 106.                   |       |        | 603.   |          | <b>0.02</b> |                 |       |        | 560.   |          | 0.84        |
|                                | 88.7       | 88.7   | 1      | 8      | 5.37     | 1           | 6                      | 106.6 | 1      | 8      | 5.41     | <b>0</b>    | 0.5             | 0.5   | 1      | 1      | 0.04     | 6           |
| Ecotype × Species number       |            |        |        | 620.   |          | 0.67        |                        |       |        | 617.   |          | 0.57        |                 |       |        | 572.   |          | 0.41        |
|                                | 3.0        | 3.0    | 1      | 1      | 0.18     | 2           | 6.4                    | 6.4   | 1      | 7      | 0.32     | 0           | 8.1             | 8.1   | 1      | 6      | 0.66     | 7           |
| Home vs Away × Species number  |            |        |        | 620.   |          | 0.88        |                        |       |        | 617.   | <0.0     | 0.98        |                 |       |        | 572.   |          | 0.61        |
|                                | 0.3        | 0.3    | 1      | 0      | 0.02     | 6           | <0.1                   | <0.1  | 1      | 7      | 1        | 6           | 3.1             | 3.1   | 1      | 3      | 0.25     | 4           |
| Fertilisation × Species number |            |        |        | 605.   |          | 0.30        |                        |       |        | 603.   |          | 0.53        |                 |       |        | 560.   |          | 0.98        |
|                                | 17.2       | 17.2   | 1      | 8      | 1.04     | 8           | 7.7                    | 7.7   | 1      | 8      | 0.39     | 1           | <0.1            | <0.1  | 1      | 2      | 0.00     | 5           |
| Organ × Country                |            |        |        | 621.   | 2.89     | 0.08        | 14.3                   | 14.3  | 1      | 621.   | 0.72     | 0.39        | 562.            | 562.6 | 1      | 574.   | 45.9     | <0.0        |

|                                                  |       |       |   |      |      |              |              |       |              |      |      |              |           |      |              |      |      |      |              |
|--------------------------------------------------|-------|-------|---|------|------|--------------|--------------|-------|--------------|------|------|--------------|-----------|------|--------------|------|------|------|--------------|
|                                                  |       |       |   | 0    | 9    |              |              |       | 0            | 5    | 6    |              | 8         | 6    | <b>01</b>    |      |      |      |              |
| Organ × Ecotype                                  | 250.9 | 250.9 | 1 | 0    | 0    | <b>01</b>    | 394.         | 9     | 394.9        | 1    | 0    | 7            | <b>01</b> | 1.0  | 1.0          | 1    | 9    | 0.08 | 6            |
|                                                  |       |       |   | 621. | 15.2 | < <b>0.0</b> | 621.         | 15.2  | < <b>0.0</b> | 621. | 20.0 | < <b>0.0</b> | 621.      | 15.7 | < <b>0.0</b> | 422. | 574. | 34.5 | < <b>0.0</b> |
| Organ × Home vs Away                             | 564.9 | 564.9 | 1 | 0    | 3    | <b>01</b>    | 310.         | 8     | 310.8        | 1    | 0    | 9            | <b>01</b> | 7    | 422.7        | 1    | 8    | 3    | <b>01</b>    |
|                                                  |       |       |   | 621. |      | <b>0.00</b>  | 145.         |       | 145.2        | 1    | 0    | 7.38         | <b>7</b>  | 23.8 | 23.8         | 1    | 9    | 1.94 | 4            |
| Organ × Fertilisation                            | 164.5 | 164.5 | 1 | 0    | 9.97 | <b>2</b>     | 101.         | 2     | 145.2        | 1    | 0    | 7.38         | <b>7</b>  | 23.8 | 23.8         | 1    | 9    | 1.94 | 4            |
|                                                  |       |       |   | 621. |      | <b>0.00</b>  | 101.         |       | 101.8        | 1    | 0    | 5.17         | <b>3</b>  | 40.3 | 40.3         | 1    | 1    | 3.30 | 0            |
| Organ × Species number                           | 150.6 | 150.6 | 1 | 0    | 9.13 | <b>3</b>     | 8            | 101.8 | 101.8        | 1    | 0    | 5.17         | <b>3</b>  | 40.3 | 40.3         | 1    | 1    | 3.30 | 0            |
| Country × Fertilisation × Species number         | 0.6   | 0.6   | 1 | 8    | 0.04 | 4            | 4.9          | 4.9   | 4.9          | 1    | 8    | 0.25         | 9         | 3.9  | 3.9          | 1    | 1    | 0.32 | 1            |
|                                                  |       |       |   | 605. |      | 0.84         | 603.         |       | 603.         | 1    | 8    | 0.25         | 9         | 3.9  | 3.9          | 1    | 1    | 0.32 | 1            |
| Ecotype × Fertilisation × Species number         | 2.1   | 2.1   | 1 | 0    | 0.13 | 0            | 2.2          | 2.2   | 2.2          | 1    | 7    | 0.11         | 6         | 0.7  | 0.7          | 1    | 6    | 0.06 | 1            |
|                                                  |       |       |   | 620. |      | 0.72         | 617.         |       | 617.         | 1    | 7    | 0.11         | 6         | 0.7  | 0.7          | 1    | 6    | 0.06 | 1            |
| Home vs Away × Fertilisation × Species number    | 0.8   | 0.8   | 1 | 0    | 0.05 | 4            | 0.4          | 0.4   | 0.4          | 1    | 7    | 0.02         | 1         | 22.1 | 22.1         | 1    | 3    | 1.81 | 9            |
|                                                  |       |       |   | 620. |      | 0.82         | 617.         |       | 617.         | 1    | 7    | 0.02         | 1         | 22.1 | 22.1         | 1    | 3    | 1.81 | 9            |
| Organ × Country × Fertilisation                  | 100.8 | 100.8 | 1 | 0    | 6.11 | <b>4</b>     | 259.         | 1     | 259.1        | 1    | 0    | 6            | <b>01</b> | 7.2  | 7.2          | 1    | 8    | 0.59 | 5            |
|                                                  |       |       |   | 621. |      | <b>0.01</b>  | 259.         |       | 259.1        | 1    | 0    | 6            | <b>01</b> | 7.2  | 7.2          | 1    | 8    | 0.59 | 5            |
| Organ × Ecotype × Fertilisation                  | 0.7   | 0.7   | 1 | 0    | 0.04 | 8            | 28.8         | 28.8  | 28.8         | 1    | 0    | 1.46         | 7         | 60.3 | 60.3         | 1    | 9    | 4.92 | <b>7</b>     |
|                                                  |       |       |   | 621. |      | 0.83         | 621.         |       | 621.         | 1    | 0    | 1.46         | 7         | 60.3 | 60.3         | 1    | 9    | 4.92 | <b>7</b>     |
| Organ × Home vs Away × Fertilisation             | 210.9 | 210.9 | 1 | 0    | 8    | <b>01</b>    | 57.9         | 57.9  | 57.9         | 1    | 0    | 2.94         | 7         | 3    | 102.3        | 1    | 7    | 8.35 | <b>4</b>     |
|                                                  |       |       |   | 621. |      | 12.7         | < <b>0.0</b> |       | 57.9         | 1    | 0    | 2.94         | 7         | 3    | 102.3        | 1    | 7    | 8.35 | <b>4</b>     |
| Organ × Country × Species number                 | 8.5   | 8.5   | 1 | 0    | 0.52 | 2            | 16.1         | 16.1  | 16.1         | 1    | 0    | 0.82         | 6         | 17.0 | 17.0         | 1    | 9    | 1.39 | 9            |
|                                                  |       |       |   | 621. |      | 0.47         | 621.         |       | 621.         | 1    | 0    | 0.82         | 6         | 17.0 | 17.0         | 1    | 9    | 1.39 | 9            |
| Organ × Ecotype × Species number                 | <0.1  | <0.1  | 1 | 0    | 1    | 3            | 19.1         | 19.1  | 19.1         | 1    | 0    | 0.97         | 5         | 3.1  | 3.1          | 1    | 0    | 0.25 | 7            |
|                                                  |       |       |   | 621. |      | 0.97         | 621.         |       | 621.         | 1    | 0    | 0.97         | 5         | 3.1  | 3.1          | 1    | 0    | 0.25 | 7            |
| Organ × Home vs Away × Species number            | 29.9  | 29.9  | 1 | 0    | 1.81 | 9            | 1.8          | 1.8   | 1.8          | 1    | 0    | 0.09         | 4         | 75.3 | 75.3         | 1    | 9    | 6.15 | <b>3</b>     |
|                                                  |       |       |   | 621. |      | 0.17         | 621.         |       | 621.         | 1    | 0    | 0.09         | 4         | 75.3 | 75.3         | 1    | 9    | 6.15 | <b>3</b>     |
| Organ × Fertilisation × Species number           | 2.3   | 2.3   | 1 | 0    | 0.14 | 1            | 11.4         | 11.4  | 11.4         | 1    | 0    | 0.58         | 7         | 7.9  | 7.9          | 1    | 1    | 0.64 | 3            |
|                                                  |       |       |   | 621. |      | 0.71         | 621.         |       | 621.         | 1    | 0    | 0.58         | 7         | 7.9  | 7.9          | 1    | 1    | 0.64 | 3            |
| Organ × Country × Fertilisation × Species number | 1.1   | 1.1   | 1 | 0    | 0.07 | 8            | 0.4          | 0.4   | 0.4          | 1    | 0    | 0.02         | 8         | 3.0  | 3.0          | 1    | 0    | 0.25 | 9            |
|                                                  |       |       |   | 621. |      | 0.79         | 621.         |       | 621.         | 1    | 0    | 0.02         | 8         | 3.0  | 3.0          | 1    | 0    | 0.25 | 9            |
| Organ × Ecotype × Fertilisation × Species number | 0.7   | 0.7   | 1 | 0    | 0.04 | 1            | 0.1          | 0.1   | 0.1          | 1    | 0    | 1            | 8         | 38.5 | 38.5         | 1    | 1    | 3.14 | 7            |
|                                                  |       |       |   | 621. |      | 0.84         | 621.         |       | 621.         | 1    | 0    | 1            | 8         | 38.5 | 38.5         | 1    | 1    | 3.14 | 7            |

| Organ × Home vs Away ×<br>Fertilisation × Species number | 0.4 | 0.4          | 1    | 0 | 0.03 | 1 | 12.5 | 12.5         | 1    | 0 | 0.63 | 7 | 9.0 | 9.0          | 1    | 0 | 0.73 | 2 |  |
|----------------------------------------------------------|-----|--------------|------|---|------|---|------|--------------|------|---|------|---|-----|--------------|------|---|------|---|--|
|                                                          |     |              |      |   |      |   |      |              |      |   |      |   |     |              |      |   |      |   |  |
| Random effects                                           | n   | Varia<br>nce | SD   |   |      |   | n    | Varia<br>nce | SD   |   |      |   | n   | Varia<br>nce | SD   |   |      |   |  |
| Plot ID                                                  | 637 | 31.70        | 5.63 |   |      |   | 637  | 34.13        | 5.84 |   |      |   | 593 | 22.38        | 4.73 |   |      |   |  |
| Bed ID                                                   | 29  | 1.14         | 1.07 |   |      |   | 29   | 2.24         | 1.50 |   |      |   | 29  | 2.13         | 1.46 |   |      |   |  |
| Residual                                                 |     | 16.50        | 4.06 |   |      |   |      | 19.68        | 4.44 |   |      |   |     | 12.24        | 3.50 |   |      |   |  |

515

516

517

518

519

Significance was tested with the Satterthwaite approximation method. For the net effect  $n = 1274$ , marginal  $R^2 = 0.20$ , conditional  $R^2 = 0.73$ ; for the complementarity effect  $n = 1274$ , marginal  $R^2 = 0.12$ , conditional  $R^2 = 0.69$ ; for the sampling effect  $n = 1181$ , marginal  $R^2 = 0.16$ , conditional  $R^2 = 0.72$ .

520 **Extended Data Table 3 | Type-I Analysis of Variance table of the experimental treatment effects on reproductive effort**

521

| <b>Factor</b>                          | <b>SS</b> | <b>MS</b> | <b>numDF</b> | <b>denDF</b> | <b>F-value</b> | <b>P-value</b> |
|----------------------------------------|-----------|-----------|--------------|--------------|----------------|----------------|
| Species                                | 18.87     | 2.70      | 7            | 635.5        | 191.14         | <0.001         |
| Country                                | 0.96      | 0.96      | 1            | 21.5         | 68.10          | <0.001         |
| Ecotype                                | 3.04      | 3.04      | 1            | 450.8        | 215.55         | <0.001         |
| Home vs Away                           | 0.43      | 0.43      | 1            | 464.2        | 30.48          | <0.001         |
| Fertilisation                          | 0.00      | 0.00      | 1            | 21.3         | 0.25           | 0.621          |
| Diversity                              | 0.07      | 0.07      | 1            | 77.7         | 4.81           | 0.031          |
| Species number                         | 0.01      | 0.01      | 1            | 28.4         | 1.01           | 0.323          |
| Species × Country                      | 7.04      | 1.01      | 7            | 3931.6       | 71.28          | <0.001         |
| Species × Ecotype                      | 4.15      | 0.59      | 7            | 3938.0       | 42.03          | <0.001         |
| Species × Home vs Away                 | 1.18      | 0.17      | 7            | 3963.5       | 11.91          | <0.001         |
| Species × Fertilisation                | 0.36      | 0.05      | 7            | 3728.1       | 3.66           | <0.001         |
| Species × Diversity                    | 0.09      | 0.01      | 7            | 103.7        | 0.89           | 0.519          |
| Species × Species number               | 0.19      | 0.03      | 7            | 693.2        | 1.88           | 0.070          |
| Country × Fertilisation                | 0.01      | 0.01      | 1            | 21.6         | 0.51           | 0.482          |
| Ecotype × Fertilisation                | 0.00      | 0.00      | 1            | 451.7        | 0.04           | 0.842          |
| Home vs Away × Fertilisation           | 0.04      | 0.04      | 1            | 465.1        | 2.66           | 0.104          |
| Country × Diversity                    | 0.01      | 0.01      | 1            | 1461.3       | 0.50           | 0.479          |
| Country × Species number               | 0.00      | 0.00      | 1            | 482.6        | 0.02           | 0.897          |
| Ecotype × Diversity                    | 0.01      | 0.01      | 1            | 1460.2       | 0.36           | 0.549          |
| Ecotype × Species number               | 0.00      | 0.00      | 1            | 479.6        | 0.00           | 0.996          |
| Home vs Away × Diversity               | 0.01      | 0.01      | 1            | 1462.0       | 0.95           | 0.331          |
| Home vs Away × Species number          | 0.01      | 0.01      | 1            | 491.8        | 0.65           | 0.420          |
| Fertilisation × Diversity              | 0.00      | 0.00      | 1            | 1443.9       | 0.06           | 0.803          |
| Fertilisation × Species number         | 0.08      | 0.08      | 1            | 463.5        | 5.61           | 0.018          |
| Species × Country × Fertilisation      | 0.43      | 0.06      | 7            | 3926.5       | 4.33           | <0.001         |
| Species × Ecotype × Fertilisation      | 0.14      | 0.02      | 7            | 3940.0       | 1.40           | 0.200          |
| Species × Home vs Away × Fertilisation | 0.19      | 0.03      | 7            | 3960.0       | 1.95           | 0.057          |

|                                                         |      |      |     |          |         |       |
|---------------------------------------------------------|------|------|-----|----------|---------|-------|
| Species × Country × Diversity                           | 0.23 | 0.03 | 7   | 1860.0   | 2.30    | 0.025 |
| Species × Country × Species number                      | 0.18 | 0.03 | 7   | 3938.9   | 1.81    | 0.080 |
| Species × Ecotype × Diversity                           | 0.08 | 0.01 | 7   | 1870.9   | 0.80    | 0.583 |
| Species × Ecotype × Species number                      | 0.09 | 0.01 | 7   | 3958.7   | 0.93    | 0.485 |
| Species × Home vs Away × Diversity                      | 0.09 | 0.01 | 7   | 1936.8   | 0.91    | 0.496 |
| Species × Home vs Away × Species number                 | 0.09 | 0.01 | 7   | 4006.5   | 0.93    | 0.480 |
| Country × Fertilisation × Diversity                     | 0.04 | 0.04 | 1   | 1474.3   | 3.04    | 0.082 |
| Country × Fertilisation × Species number                | 0.01 | 0.01 | 1   | 472.5    | 0.69    | 0.408 |
| Ecotype × Fertilisation × Diversity                     | 0.03 | 0.03 | 1   | 1468.8   | 2.12    | 0.145 |
| Ecotype × Fertilisation × Species number                | 0.01 | 0.01 | 1   | 479.8    | 0.43    | 0.514 |
| Home vs Away × Fertilisation × Diversity                | 0.00 | 0.00 | 1   | 1481.0   | 0.09    | 0.765 |
| Home vs Away × Fertilisation × Species number           | 0.06 | 0.06 | 1   | 489.2    | 4.06    | 0.044 |
| Species × Country × Fertilisation × Diversity           | 0.20 | 0.01 | 14  | 1883.5   | 0.99    | 0.456 |
| Species × Country × Fertilisation × Species number      | 0.27 | 0.02 | 14  | 3913.5   | 1.37    | 0.160 |
| Species × Ecotype × Fertilisation × Diversity           | 0.07 | 0.01 | 7   | 1931.6   | 0.69    | 0.680 |
| Species × Ecotype × Fertilisation × Species number      | 0.06 | 0.01 | 7   | 3965.8   | 0.65    | 0.715 |
| Species × Home vs Away × Fertilisation × Diversity      | 0.18 | 0.03 | 7   | 2052.5   | 1.78    | 0.087 |
| Species × Home vs Away × Fertilisation × Species number | 0.11 | 0.02 | 7   | 4009.3   | 1.13    | 0.338 |
| <hr/>                                                   |      |      |     |          |         |       |
| Random effects                                          |      |      | n   | Variance | SD      |       |
| Plot ID                                                 |      |      | 762 | 0.00104  | 0.03227 |       |
| Species composition                                     |      |      | 48  | 0.00005  | 0.00726 |       |
| Bed ID                                                  |      |      | 29  | 0.00021  | 0.01444 |       |
| Residual                                                |      |      |     | 0.01410  | 0.11875 |       |

522

523 Significance was tested with the Satterthwaite approximation method.  $n = 4751$ . Marginal  $R^2 = 0.40$ , conditional  $R^2 = 0.45$ .

524



525 **Extended Data Table 4 | Type-III Analysis of Variance table of the relationship between the difference in reproductive effort between**  
 526 **mixtures and monocultures and corresponding changes in plant interaction intensity and plant traits**

| Factor               | SS     | MS       | numDF   | denDF  | F-value | P-value |
|----------------------|--------|----------|---------|--------|---------|---------|
| Species              | 0.817  | 0.117    | 7       | 1579.6 | 11.18   | <0.001  |
| ΔNIntC               | 0.534  | 0.534    | 1       | 1588.5 | 51.09   | <0.001  |
| ΔHeight              | 0.212  | 0.212    | 1       | 1539.5 | 20.27   | <0.001  |
| ΔLeaf area           | 0.097  | 0.097    | 1       | 1588.8 | 9.31    | 0.002   |
| ΔSLA                 | 0.096  | 0.096    | 1       | 1576.9 | 9.23    | 0.002   |
| ΔLDMC                | <0.001 | <0.001   | 1       | 1578.8 | <0.01   | 0.984   |
| Species × ΔNIntC     | 0.509  | 0.073    | 7       | 1580.9 | 6.96    | <0.001  |
| Species × ΔHeight    | 0.233  | 0.033    | 7       | 1583.6 | 3.19    | 0.002   |
| Species × ΔLeaf area | 0.212  | 0.030    | 7       | 1580.6 | 2.89    | 0.005   |
| Species × ΔSLA       | 0.245  | 0.035    | 7       | 1579.7 | 3.35    | 0.002   |
| Species × ΔLDMC      | 0.259  | 0.037    | 7       | 1582.1 | 3.54    | <0.001  |
| Random effects       | n      | Variance | SD      |        |         |         |
| Plot ID              | 637    | <0.0001  | <0.0001 |        |         |         |
| Bed ID               | 29     | 0.0004   | 0.0198  |        |         |         |
| Residuals            |        | 0.0104   | 0.1022  |        |         |         |

527

528 Significance was tested with the Satterthwaite approximation method. n = 1637. Marginal  $R^2 = 0.16$ , conditional  $R^2 = 0.19$ .

529

530 **Extended Data Table 5 | Cultivar and seed supplier for the crop species used in the**  
 531 **experiment**

| Species                      | Switzerland |                                   | Spain                    |                               |
|------------------------------|-------------|-----------------------------------|--------------------------|-------------------------------|
|                              | Cultivar    | Supplier                          | Cultivar                 | Supplier                      |
| <i>Avena sativa</i>          | Canyon      | Sativa Rheinau                    | Previsión                | INIA, Madrid                  |
| <i>Triticum aestivum</i>     | Fiorina     | DSP, Delley                       | Cabezorro<br>(BGE015403) | INIA, Madrid                  |
| <i>Coriandrum sativum</i>    | Indian      | Zollinger Samen, Les<br>Evouettes | wild type                | Semillas Cantueso,<br>Córdoba |
| <i>Chenopodium quinoa</i>    | n.a.        | Artha Samen,<br>Münsingen         | Atlas                    | Algosur, Sevilla              |
| <i>Lupinus angustifolius</i> | Boregine    | Aspenhof, Wilchingen              | wild type                | Semillas Cantueso,<br>Córdoba |
| <i>Lens culinaris</i>        | Anicia      | Agroscope,<br>Reckenholz          | de la Armuña             | Legumer SL,<br>Salamanca      |
| <i>Camelina sativa</i>       | n.a.        | Zollinger Samen, Les<br>Evouettes | n.a.                     | Camelina Company,<br>Madrid   |
| <i>Linum usitatissimum</i>   | Lirina      | Sativa Rheinau                    | wild type                | Semillas Cantueso,<br>Córdoba |

532

533

534 **Extended Data Fig. 1 | Reproductive effort of crops in response to the Home vs Away,**  
535 **Fertilization, Country and Species number (2- vs 4-species mixtures) treatments**

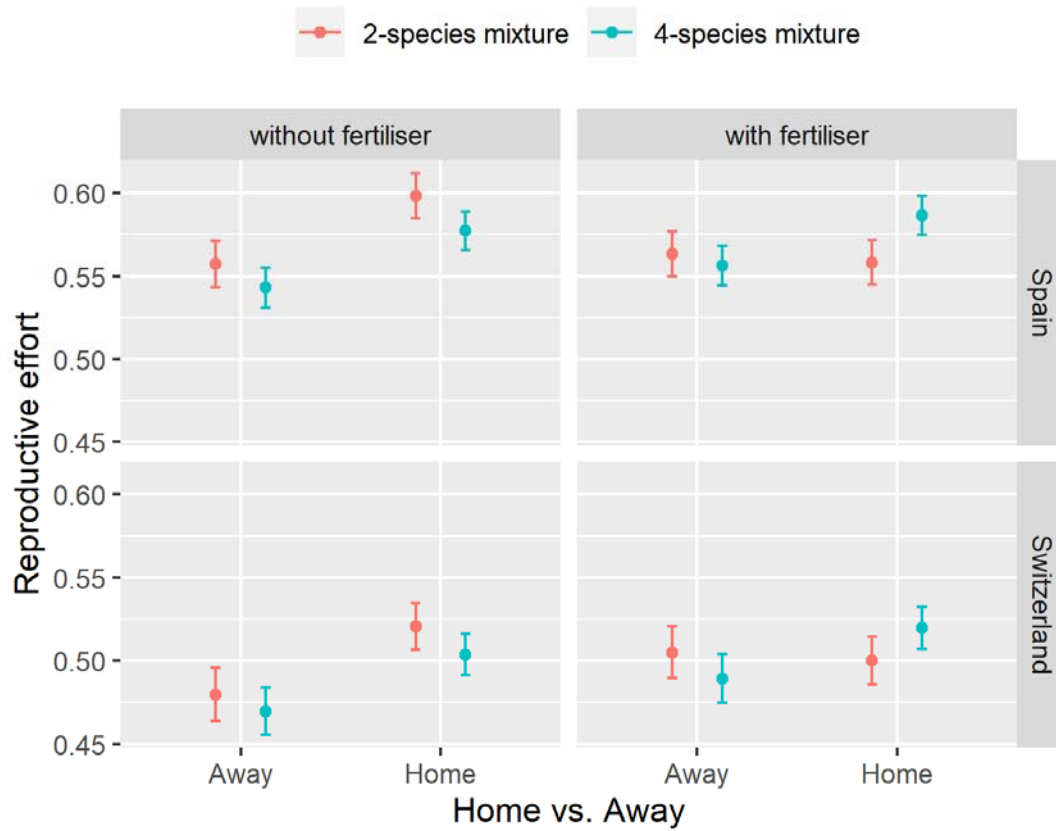

536

537

538 **Extended Data Fig. 2 | Reproductive effort of the eight crop species planted in**  
 539 **communities of different species composition**

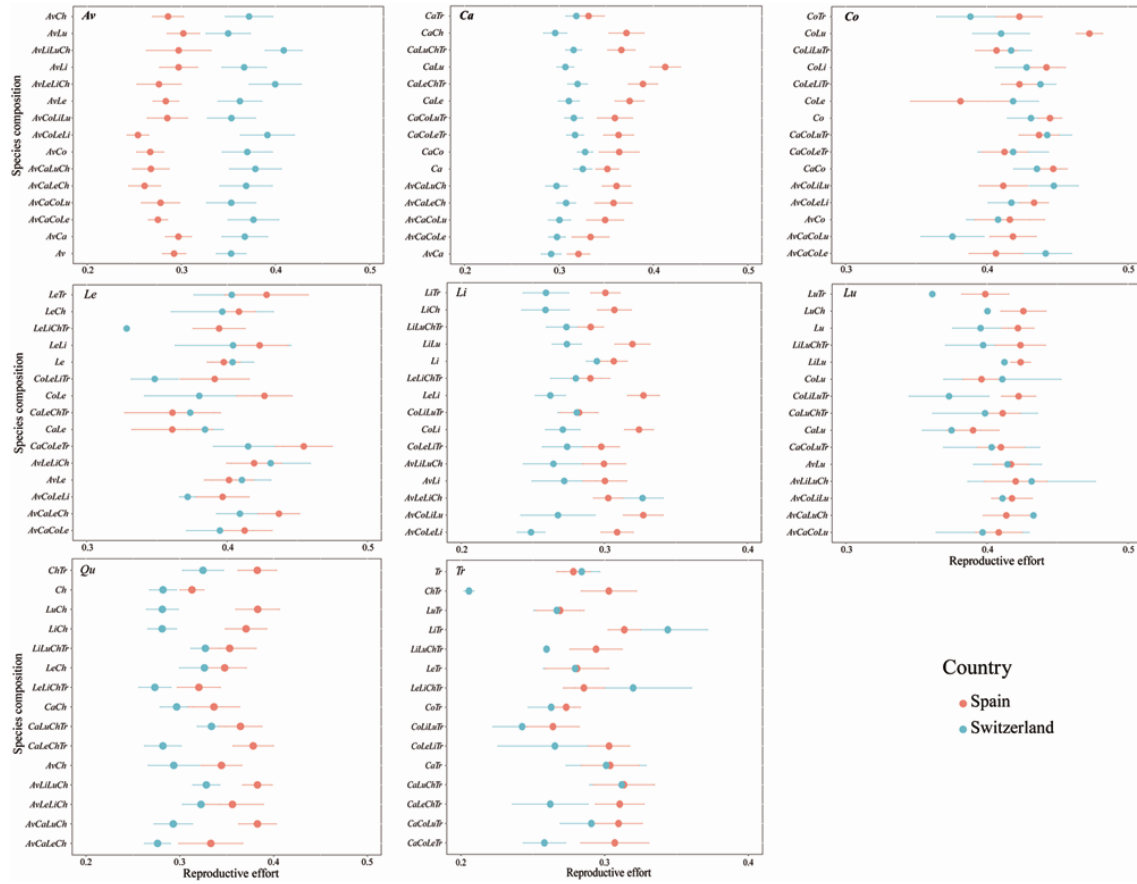

540

541 Species were abbreviated as: *Avena sativa* = Av, *Triticum aestivum* = Tr, *Camelina sativa* =  
 542 Ca, *Coriandrum sativum* = Co, *Lens culinaris* = Le, *Lupinus angustifolius* = Lu, *Linum*  
 543 *usitatissimum* = Li and *Chenopodium quinoa* = Ch.

544

545 **Extended Data Fig. 3 | Reproductive effort for eight crop species in their Home vs Away**  
546 **environment**

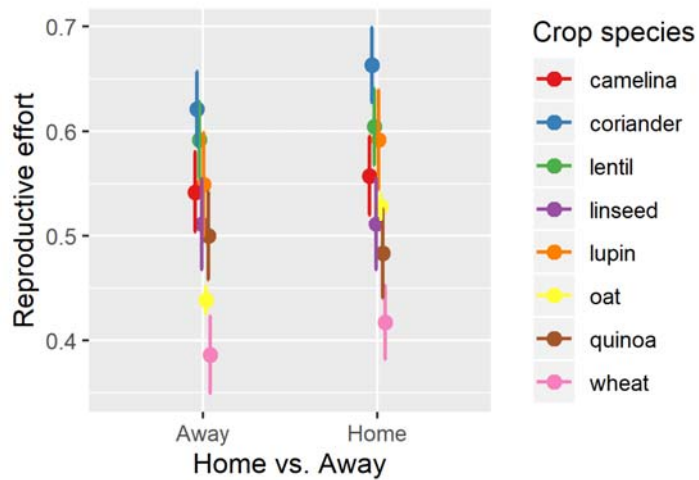

547

548 Reproductive effort quantifies the proportion of reproductive biomass, i.e. seed yield, from  
549 total aboveground biomass produced by the Spanish cultivars in Spain and the Swiss cultivars  
550 in Switzerland (Home) and vice versa (Away).
